# Supplementary material
Source: bioRxiv or medRxiv preprint supplement (https://www.biorxiv.org/highwire/filestream/25755/field_highwire_adjunct_files/8/091785-8.pdf)
Supplement: Supplementary file [file 091785-8.pdf]

**A** Total RNA sample

3' Non-phosphorylated transcripts (5'-OH)

PPP\* 3' Primary transcripts

P 3' Mono-phosphorylated transcripts  
(specific targets for XRN1 digestion)

YRN1

**B**

Diagram B illustrates the action of the RppH protein on a DNA duplex. The RppH protein, represented by a grey diamond, is shown cleaving the 3' terminal pyrophosphate (PPP\*) of the DNA strand, releasing inorganic pyrophosphate (PPi) and leaving a phosphate group (P\*) on the DNA strand. The DNA duplex is shown with a grey strand and a red strand, both labeled 3' at the right end.

**C**

Large excess of RNA oligo **Rp6**:

T4 RNA ligase 1

**D**

Are blocked by the 5'-OH

Get a 5' extension with the Rp6 sequence

**E**

PPP 3' B P\* 3' B

Rp6

**F**

5' 5' 5'

cRp6 \*

**G**

A XXX cRp6 \* B

**H**

50 bp

XXX XXX \*

3' 5'
